1 **Title: Laboratory strains of *Aedes aegypti* are Competent to**

2 **Brazilian Zika virus**

3 **Short title: *Aedes aegypti* laboratory strains and Zika virus**

4 André Luis Costa-da-Silva<sup>1,2</sup>, Rafaella Sayuri Ioshino<sup>1,2</sup>, Helena Rocha Corrêa Araújo<sup>1,2</sup>,  
5 Bianca Burini Kojin<sup>1,2</sup>, Paolo Marinho de Andrade Zanotto<sup>3</sup>, Danielle Bruna Leal  
6 Oliveira<sup>3</sup>, Stella Rezende Melo<sup>3</sup>, Edison Luiz Durigon<sup>3</sup>, Margareth Lara Capurro<sup>1,2\*</sup>

7

8 <sup>1</sup>Departamento de Parasitologia, Instituto de Ciências Biomédicas, Universidade de  
9 São Paulo, São Paulo, SP, Brasil.

10 <sup>2</sup>Instituto Nacional de Ciência e Tecnologia em Entomologia Molecular, INCT-EM, Rio  
11 de Janeiro, Rio de Janeiro, Brazil.

12 <sup>3</sup>Departamento de Microbiologia, Instituto de Ciências Biomédicas, Universidade de  
13 São Paulo, São Paulo, SP, Brasil.

14

15 \*Correspondence: [mcapurro@icb.usp.br](mailto:mcapurro@icb.usp.br)

16

17 **Keywords:** *Aedes aegypti*; Zika virus; ZIKV<sup>BR</sup>; Rockefeller; Higgs white eyes; Rexville

18

19

20

21 **Abstract**

22 Since the Zika outbreaks are unprecedented human threat in relation to congenital  
23 malformations and neurological/autoimmune complications as well as its high potential  
24 to spread in regions presenting the vectors, improvements in mosquito control is a top  
25 priority. Thus, *Aedes aegypti* laboratory strains will be fundamental to support studies in  
26 different research fields implicated on Zika-mosquito interactions which are the basis for  
27 the development of innovative control methods. In this sense, we determined the main  
28 infection aspects of the Brazilian Zika strain in reference *Aedes aegypti* laboratory  
29 mosquitoes.

30 We orally exposed Rockefeller, Higgs and Rexville mosquitoes to a Brazilian ZIKV  
31 (ZIKV<sup>BR</sup>) and qRT-PCR was applied to determine the infection and dissemination rates,  
32 and viral levels in mosquito tissues as well as in the saliva. The ZIKV<sup>BR</sup> kinetics was  
33 monitored during the infection in Rockefeller mosquitoes. Rockefeller strain was the  
34 most susceptible at 7 days post-infection but all strains presented similar infection levels  
35 at 14 days post-infection. Although variations in the saliva detection rates were  
36 observed, we confirmed that ZIKV<sup>BR</sup> was present in saliva from Rockefeller, Higgs and  
37 Rexville females at detectable levels at 14 days post-infection. The ZIKV<sup>BR</sup> kinetics in  
38 Rockefeller mosquitoes showed that the virus could be detected in the heads at 4 days  
39 post-infection but was more consistently detected late in infection. The viral levels  
40 peaked at 11 days post-infection in the mosquito bodies, remaining stable until 14 days  
41 post-infection, in contrast to the heads, where the mean viral levels only peaked at 14  
42 days post-infection.

43 Our study presents the first evaluation on how Brazilian Zika virus behaves in reference  
44 *Aedes aegypti* strains and shed light on how the infection evolves over time. Vector

45 competence and basic hallmarks of the ZIKV<sup>BR</sup> development were revealed in  
46 laboratory mosquitoes. This study provides additional information to accelerate studies  
47 focusing on ZIKV-mosquito interactions.

48

49

50

51

52

53

54

55

56

## 57 Introduction

58

59           Currently, the world is facing a new outbreak of the emerging Zika virus (ZIKV)  
60 [1]. Its association with neurological and autoimmune complications as well as infants  
61 born with microcephaly [2,3] has caused a global healthcare crisis. Due to the severe  
62 situation, it was launched a document containing an operation plan to help affected  
63 countries to establish a strategy to control the disease and improvements in vector  
64 control were highlighted as priorities [4].

65           The outcome of vector infection will rely on the specific interactions between the  
66 mosquito and virus genotypes. Therefore, better understanding of the mosquito vectors-  
67 ZIKV interactions is the basis to generate the development of innovative strategies that  
68 can be added to the arsenal in the combat of ZIKV. Recently studies have reported  
69 significant differences in susceptibility for ZIKV infection between wild mosquito  
70 populations of *Aedes aegypti*, *Aedes albopictus* and other *Aedes* species [5–7]. These  
71 vector competence studies focusing main vector species as well as variations in  
72 susceptibility of different populations from the same species are primordial to delineate  
73 improved control programs, prioritizing competent populations.

74           Although wild populations of the main vector, *Ae. aegypti*, represent the natural  
75 dynamics of the ZIKV infection process in the invertebrate host, the determination of the  
76 vector competence of different laboratory strains, which are well-adapted in captivity  
77 and readily available for experiments, is also essential to support basic and applied  
78 studies in different research fields related to vector-virus interactions. Moreover, some  
79 strains are also known to be standard in many laboratories in the world and because the  
80 experimental reproducibility is more robust than with field populations, they are used as

81 reference mosquito strains [8]. Important advances on mosquito immune responses to  
82 dengue virus (DENV) and other human pathogens have been performed on *Ae. aegypti*  
83 laboratory strains and natural mosquito populations for the purposes of comparison [8–  
84 10] as well as for the evaluation of insecticide resistance [11,12]. Furthermore, the  
85 characterization of the vector competence is relevant for more applied purposes. The  
86 development of transgenic mosquitoes mainly uses laboratory reference strains for  
87 transformation and the genetic background related to pathogen susceptibility is  
88 incorporated to the established lines. Thus, the vector competence of laboratory strains  
89 to ZIKV must be also considered in the context of the production and release of  
90 transgenic mosquitoes [13].

91 To generate basic information about the interaction between ZIKV<sup>BR</sup> and three  
92 important laboratory-maintained *Ae. aegypti* strains, Rockefeller, Higgs white eyes and  
93 Rexville mosquitoes were analyzed. The ROCK strain, an insecticide-susceptible strain  
94 of Caribbean origin that was established in 1930 [14], is commonly used as a reference  
95 for insecticides resistance trials and in DENV infection experiments [15,16]. The HWE  
96 strain is an eye-pigment-deficient *Ae. aegypti*, a variant of the Rex-D strain, and it is  
97 used as the recipient for mosquitoes germ-line transformations, because the lack of  
98 pigment is a desirable phenotype for visual screening of transgenic individuals, which  
99 are often marked with a fluorescent protein expressed in the eyes [17]. The RED strain  
100 of *Ae. aegypti*, also a variant from Rex-D strain, is widely used to investigate pathogen-  
101 host susceptibility [18].

102           This report details the ZIKV<sup>BR</sup> infection, dissemination and saliva detection rates  
103 in these three mosquito strains and reveals the viral kinetics in the ROCK reference  
104 strain.

105

## 106 **Material and methods**

### 107 **Ethics Statement**

108           The use of human blood or its derivatives products were conducted  
109 according to the principles expressed in the Declaration of Helsinki for mosquito  
110 feeding experiments. The approval of the protocol was provided by the  
111 Institutional Review Board in Human Research (IRB) (Comissão de Ética em  
112 Pesquisa com Seres Humanos do Instituto de Ciências Biomédicas/USP -  
113 CEPESH) and National Committee for Ethics in Research (Comissão Nacional de  
114 Ética em Pesquisa – CONEP), protocol #503. Number of approval: 914.876  
115 (CAAE 38518114.0.0000.5467).

116           The Brazilian Zika virus strain, named as ZIKV<sup>BR</sup>, was previously isolated  
117 from a Brazilian clinical case [2] and a lyophilized virus sample was gently  
118 provided by the Evandro Chagas Institute in Belém, Pará. The use of the  
119 anonymized viral samples were approved by our Institutional Review Board  
120 (IRB). The research was approved by the Ethics Committee on the Research  
121 with Humans (CEPESH - Off.011616) of the Institute of Biosciences of the  
122 University of São Paulo.

123

## 124 **Mosquito rearing**

125           The experiments were performed using three *Ae. aegypti* laboratory strains:  
126 HIGGS white-eye (HWE), Rexville D (RED) and Rockefeller (ROCK). Those mosquitoes  
127 were maintained in a BSL-2 insectary facility in Institute of Biomedical Sciences from  
128 University of São Paulo. The rearing conditions were  $27 \pm 1^\circ\text{C}$ , 75-80% relative humidity  
129 with 12/12 hour (light/dark) photoperiod. Adult mosquitoes were maintained *ad libitum*  
130 on 10% sucrose solution (w/v).

131

## 132 **Viral amplification and titration**

133           The Brazilian Zika virus strain, named previously as ZIKV<sup>BR</sup>, was isolated from a  
134 Brazilian clinical case [2] and a lyophilized virus sample was gently provided by the  
135 Evandro Chagas Institute in Belém, Pará. ZIKV<sup>BR</sup> was amplified and titrated as recently  
136 described [2]. Viral titrated aliquots ( $5.0 \times 10^6$  plaque forming unit [pfu]/mL) of fourth  
137 subculture (T4) was provided by the ZIKV São Paulo task force.

138

## 139 **Mosquito Infection**

140           Pre-mated 7-9 day old *Ae. aegypti* females were sucrose 10%-deprived for 24  
141 hours prior blood meal. Starved females received ZIKV<sup>BR</sup> infectious blood meal by using  
142 the Glytube artificial feeder [19]. Human concentrated erythrocyte was mixed with  
143 ZIKV<sup>BR</sup> supernatant and inactivated human serum in a 10:10:1 proportion, respectively  
144 and the ZIKV<sup>BR</sup> final titer in this mixture was  $2.2 \times 10^6$  pfu/mL. The infected-blood was  
145 offered to female mosquitoes for 45 minutes. Non-engorged females were removed and

146 engorged ones were kept in plastic cups maintained with 10% sucrose solution until the  
147 collection times.

148

#### 149 **Mosquito saliva and tissue samples.**

150 Saliva, heads and bodies from individual mosquitoes (10 each), were collected at  
151 7 and 14 dpi for virus detection. For saliva, the forced salivation technique as used as  
152 previously described [20,21], with modifications. Mosquitoes were CO<sub>2</sub> anaesthetized,  
153 transferred to a Petri dish on ice and legs and wings were removed with forceps. A  
154 glass slide with a strip of modeling clay was used to support micropipette tips filled with  
155 10 µL of Leibovitz's L-15 medium (Gibco<sup>tm</sup>) and the proboscis of each live mosquito  
156 were inserted into the tip. Insects were allowed to salivate for 45 minutes and total  
157 volume was ejected into the 1.5 mL microtube. After salivation, heads were separated  
158 from the rest of the bodies using a McPherson-Vannas Scissors #501234 (World  
159 Precision Instruments, Sarasota, FL) and each tissue was transferred to a 1.5 mL  
160 microtube. Bodies, heads and saliva samples collected at 7 and 14 dpi were  
161 immediately frozen in dry ice and stored at -80°C.

162

#### 163 **RNA extraction of mosquito samples**

164 Total RNA from individual heads, bodies and saliva were extracted using QIAmp  
165 Viral RNA Mini Kit (Qiagen, Valencia, CA, USA) following manufacturer's  
166 recommendations. Total RNA was eluted in 60 µL of elution buffer and kept in -80°C  
167 until qRT-PCR analyses.

168



## 169 **One-step qRT-PCR analysis**

170 To detect ZIKV and to quantify viral copy numbers, the Power SYBR<sup>®</sup> Green  
171 RNA-to-C<sub>T</sub><sup>™</sup> 1-Step kit (Applied Biosystems, Foster City, CA, USA) was used in qRT-  
172 PCR reactions as described by the manufacturer. Each sample was analyzed in  
173 technical duplicates in a 20 µL final volume reactions containing 5 µL of total RNA and  
174 0.5 µM for each ZIKV 835 and ZIKV 911c primers [22]. Negative (RNase free water)  
175 and positive controls (500 ng of total RNA extracted from ZIKV cell culture supernatant  
176 aliquot) were used in each assay. Samples were considered positive for ZIKV only  
177 when detected in both analyses. The assays were performed in Mastercycler Realplex 2  
178 thermocycler (Eppendorf) with the following conditions: 48°C for 30 min and 95°C for 10  
179 min followed by 40 cycles of 95°C for 30 sec, 60°C for 30 sec and a melting curve step  
180 of 95°C for 1 min, 60°C for 30 sec and 95°C for 1 min, with a temperature ramping from  
181 60°C to 95°C at 0.02°C/sec. Amplicon specificity was evaluated by the peak of the  
182 melting curve (79 ± 1°C) and primer pair efficiency ranged from 1.01 to 1.02.

183 For ZIKV copy number estimation, a standard curve was generated as described [23],  
184 with some modification. Briefly, a target plasmid containing a 76 bp ZIKV fragment  
185 amplified with ZIKV 835 and ZIKV 911c primer pairs was linearized and nine serial  
186 dilutions ranging from 10<sup>-9</sup> to 10<sup>-17</sup> g were used to produce a standard curve. The limit of  
187 detection was experimentally established in 23 copies (10<sup>-16</sup> g dilution). The ZIKV  
188 absolute copy numbers were extrapolated from the standard curves (R<sup>2</sup> ranged from  
189 0.990 to 0.996), adjusted by back-calculation to the total RNA volume (60 µL) and were  
190 expressed as copies per tissue.

191

## 192 **Infection, dissemination and saliva detection rate analysis**

193           Following the definitions proposed in [5]. The adopted infection rate (or  
194 prevalence) is determined as the proportion of mosquitoes with virus detected in body  
195 (abdomen and thorax) among tested ones. Dissemination rate corresponds to the  
196 number of mosquitoes with infected heads among infected bodies (abdomen and thorax  
197 positive). Since a method to detect viral RNA in saliva was used, the term saliva  
198 detection rate was applied in place of transmission rate (which refers to infectious  
199 particles present in saliva), but with equivalent meaning. The saliva detection rate was  
200 estimated as the proportion of mosquitoes with positive saliva among mosquitoes with  
201 disseminated infection (positive heads) and was expressed as percentages.

202

## 203 **Data analysis**

204           Statistical analyses were performed in GraphPad Prism5 software package  
205 (Version 5.00) for Windows (San Diego, California, USA) and confidence intervals of  
206 95% were defined for all analyses. Fisher's exact test were applied in conformity with  
207 [24] to detected significant differences in ZIKV positive proportions of the same tissues  
208 (bodies or heads or saliva) at 7 or 14 dpi from different mosquito strains and to compare  
209 infection proportions during ZIKV kinetics in ROCK strain. Viral levels between different  
210 *Ae. aegypti* lines were compared by using Two-way ANOVA and Bonferroni posttests.

211

## 212 **Results**

### 213 **ZIKV<sup>BR</sup> infection prevalence and dissemination rates in orally challenged** 214 **mosquito strains**

215 To analyze and compare the infection susceptibility of *Ae. aegypti* laboratory  
216 strains to a Brazilian ZIKV, we orally exposed ROCK, HWE and RED mosquitoes with a  
217 low-passage ZIKV<sup>BR</sup> strain. Viral RNA levels were quantified by qRT-PCR assay in  
218 individual mosquito bodies and heads at 7 and 14 days post-infection (dpi). These  
219 intervals are well-characterized indicators for infection establishment in the abdomen  
220 and viral dissemination to the head, respectively, during flavivirus replication  
221 progression in *Ae. aegypti* mosquitoes [25].

222 The three strains exhibited high viral levels in the bodies at 7 and 14 dpi, with the  
223 mean viral copy numbers fluctuating from  $10^7$  at 7 dpi to  $10^8$  at 14 dpi (Fig 1A). At 7 dpi,  
224 the ROCK and RED strains showed the highest body infection rates (number of positive  
225 bodies/total mosquitoes tested) (90%) compared to HWE females (70%). At 14 dpi, the  
226 body infection proportion increased in HWE samples and all the strains showed the  
227 same infection rate (90%) at this time. However, the infection rate of the heads  
228 exhibited variation in the number of positive samples among the strains at 7 dpi, with  
229 ROCK at 90%, HWE at 50% and RED at 60%. At 14 dpi, the ROCK strain remained  
230 with 90% of the tested heads infected and the HWE and RED strains had increases in  
231 the percentage of infected heads to 80% and 90%, respectively. With regard to the  
232 mean viral levels observed in the head, we observed that the RED strain had  $10^5$  ZIKV  
233 copies at 7 dpi and this number increased to  $10^7$  at 14 dpi, indicating an increase of 2  
234 logs after 7 days, while the ROCK and HWE strains had infection level increases only 1

235 log (Fig 1B). When analyzing the dissemination rate (the number of infected  
236 heads/number of infected bodies), the ROCK strain had the highest index (100%)  
237 analyzed at any time (Fig 2).

238

239

240 **Fig 1. ZIKV<sup>BR</sup> infection rates and viral levels in bodies and heads from *Ae. aegypti***

241 **laboratory strains.** The infection rate and viral levels per tissue were individually

242 recorded in ROCK, HWE and RED females at 7 and 14 days following a ZIKV-infected

243 blood meal (dpi). **(A)** Viral prevalence and infection levels in the bodies. Each body

244 sample is represented by a solid circle. **(B)** Viral prevalence and infection levels in the

245 heads. Individual heads are indicated by open triangles. Black bars indicate the mean

246 viral copy numbers and the dashed grey line demonstrates the detection limit.

247 Significant differences were not observed between the bodies or heads from the three

248 strains at 7 and 14 dpi in the infection prevalences by Fisher's exact test ( $p>0.05$ ), or in

249 the viral infection levels by two-way ANOVA with Bonferroni post-tests ( $p>0.05$ )

250

251 **Fig 2. ZIKV<sup>BR</sup> infection, dissemination and saliva detection rates in *Ae. aegypti***

252 **laboratory strains.** The infection rate (number of infected bodies/total bodies

253 analyzed), dissemination rate (number of infected heads/number of infected bodies) and

254 saliva detection rate (number of infected saliva sample/number of infected heads) were

255 estimated in females from ROCK, HWE and RED strains at 7 and 14 days following a

256 ZIKV-infected blood meal (dpi). The results are represented by percentages.

257

258           Although strain variations in the infection rates and mean levels of ZIKV<sup>BR</sup> were  
259 characterized in the bodies and heads at 7 and 14 dpi, no significant differences were  
260 observed in tissue infection prevalence (Fisher's exact test,  $p>0.05$ ) and viral intensity  
261 between the ROCK, HWE and RED samples (two-way ANOVA followed by Bonferroni  
262 post-tests,  $p>0.05$ ).

263

264

### 265 **Prevalence and detection rate of ZIKV<sup>BR</sup> in mosquito saliva**

266           The presence of ZIKV<sup>BR</sup> and viral level quantitation were assessed directly for  
267 each collected saliva sample using the same qRT-PCR assay. ROCK strain females  
268 showed one positive saliva sample (10%) at 7 dpi. However, no ZIKV<sup>BR</sup> was detected in  
269 saliva from HWE and RED mosquitoes at this time point. In contrast, saliva samples  
270 from the three strains presented detectable viral levels at 14 dpi. HWE samples were  
271 40% positive for ZIKV<sup>BR</sup>, while ROCK and RED samples were 20% and 10%,  
272 respectively (Fig 3). Accordingly, the highest ZIKV<sup>BR</sup> saliva detection rate (number of  
273 positive saliva samples/total number of infected heads) was observed in the HWE strain  
274 (50%), followed by ROCK (22.22%) and RED (11.11%).

275

276 **Fig 3. ZIKV<sup>BR</sup> prevalence and viral levels in collected saliva from *Ae. aegypti***  
277 **laboratory strains.** The prevalence and viral levels per saliva sample were individually  
278 recorded in ROCK, HWE and RED strains at 7 and 14 days following a ZIKV-infected  
279 blood meal (dpi). Each saliva sample is represented by a solid star. Black bars indicate  
280 the mean viral copy numbers and the dashed grey line demonstrates the detection limit.

281 Significant differences were not observed between samples from the three strains at 7  
282 and 14 dpi in saliva infection prevalences by Fisher's exact test ( $p>0.05$ ), or in viral  
283 detection levels by two-way ANOVA and Bonferroni post-tests ( $p>0.05$ ).

284

285

286 The ZIKV<sup>BR</sup> prevalence was low in the ROCK and RED saliva samples. The  
287 mean viral levels in ROCK saliva increased 1 log ( $10^1$  to  $10^2$ ) between 7 and 14 dpi. In  
288 comparison with ROCK, It was observed higher mean ZIKV levels in the RED and HWE  
289 samples ( $10^4$ ) (Fig 3) at 14 dpi.

290 As observed in the bodies and heads, saliva samples showed strain variations  
291 related to the detection rate and the mean ZIKV<sup>BR</sup> levels (Figs 2 and 3, respectively).  
292 However, no statistically significant differences were detected in virus prevalence  
293 (Fisher's exact test,  $p>0.05$ ) or levels in the saliva (two-way ANOVA followed by  
294 Bonferroni post-tests,  $p>0.05$ ) between the ROCK, HWE and RED strains at 7 and 14  
295 dpi.

296

297

### 298 **ZIKV<sup>BR</sup> invasion and establishment kinetics in the ROCK strain**

299 ZIKV<sup>BR</sup> infection, dissemination and saliva detection rates were higher in the  
300 ROCK strain at 7 dpi (Fig 2). This result led us to perform an independent experiment in  
301 order to determine the kinetics of ZIKV<sup>BR</sup> during the establishment and dissemination of  
302 infection in females from this strain. Five time-points post-infected blood meal (1, 4, 7,

303 11 and 14 dpi) were used to perform a quantitative analysis of the viral levels in the  
304 individual bodies and heads (Fig 4).

305

306 **Fig 4. ZIKV<sup>BR</sup> kinetics in bodies and heads of *Ae. aegypti* from the ROCK strain.**

307 The infection rate and viral levels per tissue were individually recorded at 1, 4, 7, 11 and  
308 14 days following a ZIKV-infected blood meal (dpi). Solid circles and open triangles  
309 represent each body and head sample, respectively, from the ROCK females. Solid  
310 (body) and dashed (head) blue lines indicates the viral infection progression (mean  
311 levels) during the time-course experiment. Dashed blue bars indicate early (1 to 4 dpi)  
312 and late (7 to 14 dpi) infection stages in heads in which a significant difference in  
313 infection prevalence was observed between the two stages using Fisher's exact test (\*,  
314 1 dpi x 7 dpi - p=0.0031; 1 dpi x 11 dpi - p=0.0007; 1dpi x 14 dpi - p<0.0001; 4 dpi x 7  
315 dpi - p=0.0198; 4 dpi x 11 dpi - p=0.0055; 4 dpi x 14 dpi - p=0.0001). The dashed grey  
316 line demonstrates the detection limit.

317

318

319

320 As expected, all the body samples analyzed were positive for ZIKV<sup>BR</sup> at 1 dpi and  
321 the mean viral levels was  $7.68 \times 10^4$  copies. These results probably reflect the viral load  
322 ingested during the oral infection of the ROCK females and ZIKV<sup>BR</sup> particles still present  
323 in the infectious blood remaining in the blood bolus inside the midgut. Not surprisingly,  
324 none of the heads showed detectable levels of ZIKV in this period.

325           The detected viral copies increased gradually in the bodies and heads over the  
326 experimental time course. At 4 dpi, when the blood had been completely digested, the  
327 prevalence was 70% in the bodies and 10% in the heads, indicating that in some ROCK  
328 females, ZIKV<sup>BR</sup> infection can evolve more rapidly, reaching the head and producing  
329 high infection intensity in the nervous tissues ( $10^5$ ) over a short period after infection  
330 (Fig 4).

331           The amount of infected bodies remained at the same level (70%) at 7 dpi,  
332 however, the number of virus-infected heads increased to 70% and the mean viral  
333 levels were enhanced by approximately 2 logs. ZIKV<sup>BR</sup> was detected in the bodies of all  
334 analyzed mosquito samples at 11 and 14 dpi. Furthermore, a viral level peak was  
335 reached at 11 dpi, and an infection plateau was maintained in the body tissues between  
336 the last two sampling times (Fig 4).

337           The ZIKV<sup>BR</sup> prevalence was 80% in the heads at 11 dpi and 100% at 14 dpi. The  
338 mean viral levels increased during the 14 days of infection from 0.0 to  $3.13 \times 10^7$  copies  
339 in the heads of mosquitoes fed with a viral titer of  $2.27 \times 10^6$  pfu/mL (final  
340 concentration). The infection rates of the ROCK head samples varied significantly  
341 between the early (1 dpi and 4 dpi) and late time points of infection (7, 11 and 14 dpi)  
342 (Fisher's exact test,  $p < 0.05$ ).

343



## 344 Discussion

345 Basic knowledge on the interactions ZIKV with its vectors is one of the priorities  
346 in order to create a solid scientific foundation supporting traditional and innovative  
347 methods to face the Zika challenge [26]. The literature in this field is expanding with  
348 recent studies uncovering the main species naturally infected with ZIKV [27–29] and  
349 characterizing the viral susceptibility of the natural populations in regions with the  
350 potential for urban transmission [5,30]. As important as these studies including wild or  
351 recently colonized mosquitoes are, well-adapted laboratory vector strains will provide a  
352 consistent basis for reliable cellular and molecular studies of the virus-mosquito  
353 interaction, in which execution feasibility and reproducibility are essential.

354 Recently, the laboratory-adapted mosquito strains, HWE and Orlando (ORL),  
355 were used to describe the infection pattern of chikungunya virus (CHIKV). Both  
356 mosquito strains were susceptible to the CHIKV, and viral particles were detected in the  
357 saliva only two days after an infectious blood meal. The CHIKV infection pattern in  
358 midguts and dissemination rate were significantly lower for the ORL in comparison to  
359 the HWE strain until 3 dpi, although the HWE and ORL mosquitoes showed similar  
360 rates of virus in the saliva (60 and 65%, respectively) at 7 dpi [31].

361 Our study also found variations between laboratory-adapted strains during the  
362 ZIKV infection. Although *Ae. aegypti* infection dynamics is more rapid for the CHIKV (an  
363 alphavirus member from the Togaviridae family) than the ZIKV (a flavivirus from the  
364 Flaviviridae family), the HWE strain demonstrates lower saliva prevalence in  
365 comparison to the ROCK strain in early sampling time during ZIKV<sup>BR</sup> infection. The

366 same pattern was observed in the HWE mosquitoes in relation to the ORL strain when  
367 exposed to the CHIKV [31].

368 CHIKV prevalence into saliva of the HWE increases from 20% at 2 dpi to 60% at  
369 7 dpi, differing from the ORL strain (55% at 2 dpi to 65% at 7 dpi)[31]. Our study also  
370 demonstrates that the increase of the ZIKV<sup>BR</sup> saliva detection rate was more  
371 pronounced in the HWE infected mosquitoes (0% at 7 dpi to 50% at 14 dpi) in relation to  
372 the RED (0% at 7 dpi to 11.1% at 14 dpi) and ROCK (11.1% at 7 dpi to 22.2% at 14  
373 dpi). This result is surprising since the HWE has the lowest infection rate among the  
374 strains at 7 dpi while the ROCK mosquitoes showed ZIKV<sup>BR</sup> susceptibility that results in  
375 faster infection establishment and dissemination. More interestingly, the HWE strain  
376 showed the highest ZIKV<sup>BR</sup> load in the saliva at late infection stage and a similar result  
377 was demonstrated for the HWE mosquitoes infected with CHIKV [31].

378 American populations of *Ae. aegypti* were orally exposed to an Asian genotype of  
379 ZIKV and viral infection and dissemination were observed in the early days post-  
380 infection. Although the infection rates were high, dissemination and transmission rates  
381 were comparatively low [5]. The infection and saliva detection rates were similar to our  
382 results, but we found high dissemination rates in all *Ae. aegypti* strains tested.

383 Consistent with our findings with ZIKV<sup>BR</sup> infection in *Ae. aegypti* laboratory  
384 strains, other studies found the same high susceptibility in wild mosquito populations  
385 infected with different ZIKV strains, highlighting that the reference strains can mimic the  
386 infection pattern of wild population [5,32].

387 The present work adopted qRT-PCR as a rapid and efficient method to  
388 characterize vector competence [7] and to precisely measure the viral levels during the

389 infection process [24,33]. Studies have shown a consistent correlation between viral  
390 RNA levels and infectious viral particles of different flaviviridae [34,35]. Based on  
391 ZIKV<sup>BR</sup> genome amplification, we measured the saliva detection rates to verify the  
392 ZIKV<sup>BR</sup> competence of three *Ae. aegypti* laboratory strains. The detection of virus RNA  
393 in the mosquito saliva indicates that salivary gland infection and escape barriers were  
394 overcome and implies that *Ae. aegypti* mosquitoes from the ROCK, HWE and RED  
395 strains are competent to ZIKV<sup>BR</sup>.

396

## 397 **Conclusions**

398 The results from our study confirm that ROCK, HWE and RED laboratory strains not  
399 only sustain the development of the Brazilian Zika virus but are also competent for virus  
400 transmission. These findings provide useful comparisons for future researches and will  
401 dictate the strains that suits best for desired experiments. In this sense, this knowledge  
402 is fundamental for Zika-invertebrate host studies, especially because we determined the  
403 main infection aspects of the ZIKV<sup>BR</sup> strain in reference *Aedes aegypti* laboratory  
404 mosquitoes. This knowledge is the first step to support the researches aiming to  
405 understand ZIKV-vector biology focusing innovative solutions on vector control.

406

## 407 **Acknowledgements**

408 We thanks Dr. Pedro Vasconcelos from Evandro Chagas Institute IEC in Belém  
409 for providing the lyophilized ZIKV isolate, Carla Torres Braconi for technical advices and  
410 Isabel Cristina dos Santos Marques and Ediane Saraiva Fernandes for technical  
411 assistance.

## 412 **References**

- 413 1. Musso D, Gubler DJ (2016) Zika Virus. *Clin Microbiol Rev* 29: 487–524. Available:  
414 <http://cmr.asm.org/lookup/doi/10.1128/CMR.00072-15>.
- 415 2. Cugola FR, Fernandes IR, Russo FB, Freitas BC, Dias JLM, et al. (2016) The  
416 Brazilian Zika virus strain causes birth defects in experimental models. *Nature*  
417 534: 267–271. Available: <http://www.nature.com/doi/10.1038/nature18296>.
- 418 3. Mlakar J, Korva M, Tul N, Popović M, Poljšak-Prijatelj M, et al. (2016) Zika Virus  
419 Associated with Microcephaly. *N Engl J Med* 374: 951–958. Available:  
420 <http://www.nejm.org/doi/abs/10.1056/NEJMoa1600651>  
421 <http://www.ncbi.nlm.nih.gov/pubmed/26862926>.
- 422 4. WHO (2016) WHO, Zika Strategic Response Framework and Joint Operations  
423 Plan.
- 424 5. Chouin-Carneiro T, Vega-Rua A, Vazeille M, Yebakima A, Girod R, et al. (2016)  
425 Differential Susceptibilities of *Aedes aegypti* and *Aedes albopictus* from the  
426 Americas to Zika Virus. *PLoS Negl Trop Dis* 10: e0004543. Available:  
427 <http://dx.doi.org/10.1371/journal.pntd.0004543>.
- 428 6. Di Luca M, Severini F, Toma L, Boccolini D, Romi R, et al. (2016) Experimental  
429 studies of susceptibility of Italian *Aedes albopictus* to Zika virus. *Eurosurveillance*  
430 21: 30223. Available:  
431 <http://eurosurveillance.org/ViewArticle.aspx?ArticleId=22468>.
- 432 7. Diagne CT, Diallo D, Faye O, Ba Y, Faye O, et al. (2015) Potential of selected  
433 Senegalese *Aedes* spp. mosquitoes (Diptera: Culicidae) to transmit Zika virus.  
434 *BMC Infect Dis* 15: 492. Available:

- 435 <http://www.scopus.com/inward/record.url?eid=2-s2.0->  
436 [84945971744&partnerID=tZOtx3y1.](http://www.scopus.com/inward/record.url?eid=2-s2.0-84945971744&partnerID=tZOtx3y1)
- 437 8. Bonizzoni M, Dunn WA, Campbell CL, Olson KE, Marinotti O, et al. (2012)  
438 Complex Modulation of the *Aedes aegypti* Transcriptome in Response to Dengue  
439 Virus Infection. *PLoS One* 7. doi:10.1371/journal.pone.0050512.
- 440 9. Sim S, Jupatanakul N, Ramirez JL, Kang S, Romero-Vivas CM, et al. (2013)  
441 Transcriptomic Profiling of Diverse *Aedes aegypti* Strains Reveals Increased  
442 Basal-level Immune Activation in Dengue Virus-refractory Populations and  
443 Identifies Novel Virus-vector Molecular Interactions. *PLoS Negl Trop Dis* 7:  
444 e2295. Available: <http://dx.plos.org/10.1371/journal.pntd.0002295>.
- 445 10. Colpitts TM, Cox J, Vanlandingham DL, Feitosa FM, Cheng G, et al. (2011)  
446 Alterations in the *aedes aegypti* transcriptome during infection with west nile,  
447 dengue and yellow fever viruses. *PLoS Pathog* 7.  
448 doi:10.1371/journal.ppat.1002189.
- 449 11. Bisset JA, Marín R, Rodríguez MM, Severson DW, Ricardo Y, et al. (2013)  
450 Insecticide resistance in two *Aedes aegypti* (Diptera: Culicidae) strains from Costa  
451 Rica. *J Med Entomol* 50: 352–361. Available:  
452 <http://www.ncbi.nlm.nih.gov/pubmed/23540124>.
- 453 12. Brito LP, Linss JGB, Lima-Camara TN, Belinato TA, Peixoto AA, et al. (2013)  
454 Assessing the Effects of *Aedes aegypti* kdr Mutations on Pyrethroid Resistance  
455 and Its Fitness Cost. *PLoS One* 8: e60878. Available:  
456 <http://dx.plos.org/10.1371/journal.pone.0060878>.
- 457 13. Beerntsen BT, James AA, Christensen BM (2000) Genetics of Mosquito Vector

- 458 Competence. *Microbiol Mol Biol Rev* 64: 115–137. Available:  
459 <http://www.pubmedcentral.nih.gov/articlerender.fcgi?artid=98988&tool=pmcentrez>  
460 [&rendertype=abstract](http://www.pubmedcentral.nih.gov/articlerender.fcgi?artid=98988&tool=pmcentrez&rendertype=abstract).
- 461 14. Kuno G (2010) Early history of laboratory breeding of *Aedes aegypti* (Diptera:  
462 Culicidae) focusing on the origins and use of selected strains. *J Med Entomol* 47:  
463 957–971. doi:10.1603/ME10152.
- 464 15. Araújo A, Araujo Diniz D, Helvecio E, de Barros R, de Oliveira CM, et al. (2013)  
465 The susceptibility of *Aedes aegypti* populations displaying temephos resistance to  
466 *Bacillus thuringiensis israelensis*: a basis for management. *Parasit Vectors* 6: 297.  
467 Available:  
468 [http://www.pubmedcentral.nih.gov/articlerender.fcgi?artid=3852962&tool=pmcen](http://www.pubmedcentral.nih.gov/articlerender.fcgi?artid=3852962&tool=pmcentrez&rendertype=abstract)  
469 [trez&rendertype=abstract](http://www.pubmedcentral.nih.gov/articlerender.fcgi?artid=3852962&tool=pmcentrez&rendertype=abstract).
- 470 16. Londono-Renteria B, Troupin A, Conway MJ, Vesely D, Ledizet M, et al. (2015)  
471 Dengue Virus Infection of *Aedes aegypti* Requires a Putative Cysteine Rich  
472 Venom Protein. *PLOS Pathog* 11: e1005202. Available:  
473 <http://dx.plos.org/10.1371/journal.ppat.1005202>.
- 474 17. Kojin BB, Costa-da-Silva AL, Maciel C, Henriques DA, Carvalho DO, et al. (2016)  
475 Endogenously-expressed NH2-terminus of circumsporozoite protein interferes  
476 with sporozoite invasion of mosquito salivary glands. *Malar J* 15: 153. Available:  
477 <http://www.malariajournal.com/content/15/1/153>.
- 478 18. Thathy V, Severson DW, Christensen BM (1994) Reinterpretation of the genetics  
479 of susceptibility of *Aedes aegypti* to *P. gallinaceum*. *J Parasitol* 80: 705–712.  
480 Available: [http://www3.nd.edu/~dseverso/Pubs/Thathy\\_JParasit\\_1994.pdf](http://www3.nd.edu/~dseverso/Pubs/Thathy_JParasit_1994.pdf).

- 481 19. Costa-da-Silva AL, Navarrete FR, Salvador FS, Karina-Costa M, Ioshino RS, et  
482 al. (2013) Glytube: a conical tube and parafilm M-based method as a simplified  
483 device to artificially blood-feed the dengue vector mosquito, *Aedes aegypti*. *PLoS*  
484 *One* 8: e53816. Available: <http://www.ncbi.nlm.nih.gov/pubmed/23342010>.
- 485 20. Anderson SL, Richards SL, Smartt CT (2010) A Simple Method for Determining  
486 Arbovirus Transmission in Mosquitoes. *J Am Mosq Control Assoc* 26: 108–111.  
487 Available: <http://www.bioone.org/doi/abs/10.2987/09-5935.1>.
- 488 21. Wong P-SJ, Li MI, Chong C-S, Ng L-C, Tan C-H (2013) *Aedes* (*Stegomyia*)  
489 *albopictus* (Skuse): A Potential Vector of Zika Virus in Singapore. *PLoS Negl Trop*  
490 *Dis* 7: e2348. Available: <http://dx.plos.org/10.1371/journal.pntd.0002348>.
- 491 22. Lanciotti RS, Kosoy OL, Laven JJ, Velez JO, Lambert AJ, et al. (2008) Genetic  
492 and Serologic Properties of Zika Virus Associated with an Epidemic, Yap State,  
493 Micronesia, 2007. *Emerg Infect Dis* 14: 1232–1239. Available:  
494 [http://wwwnc.cdc.gov/eid/article/14/8/08-0287\\_article.htm](http://wwwnc.cdc.gov/eid/article/14/8/08-0287_article.htm).
- 495 23. Costa-da-Silva AL, Kojin BB, Marinotti O, James AA, Capurro ML (2013)  
496 Expression and accumulation of the two-domain odorant-binding protein  
497 *AaegOBP45* in the ovaries of blood-fed *Aedes aegypti*. *Parasit Vectors* 6: 364.  
498 Available:  
499 <http://www.pubmedcentral.nih.gov/articlerender.fcgi?artid=3892079&tool=pmcentr>  
500 [ez&rendertype=abstract](http://www.pubmedcentral.nih.gov/articlerender.fcgi?artid=3892079&tool=pmcentr&rendertype=abstract).
- 501 24. Dutra HLC, Rocha MN, Dias FBS, Mansur SB, Caragata EP, et al. (2016)  
502 *Wolbachia* Blocks Currently Circulating Zika Virus Isolates in Brazilian *Aedes*  
503 *aegypti* Mosquitoes. *Cell Host Microbe* 19: 1–4. Available:

- 504 <http://dx.doi.org/10.1016/j.chom.2016.04.021>.
- 505 25. Salazar MI, Richardson JH, Sánchez-Vargas I, Olson KE, Beaty BJ (2007)
- 506 Dengue virus type 2: replication and tropisms in orally infected *Aedes aegypti*
- 507 mosquitoes. *BMC Microbiol* 7: 9. Available: [http://www.biomedcentral.com/1471-](http://www.biomedcentral.com/1471-2180/7/9)
- 508 [2180/7/9](http://www.biomedcentral.com/1471-2180/7/9).
- 509 26. Araújo H, Carvalho D, Ioshino R, Costa-da-Silva A, Capurro M (2015) *Aedes*
- 510 *aegypti* Control Strategies in Brazil: Incorporation of New Technologies to
- 511 Overcome the Persistence of Dengue Epidemics. *Insects* 6: 576–594. Available:
- 512 [www.mdpi.com/journal/insects/](http://www.mdpi.com/journal/insects/).
- 513 27. Grard G, Caron M, Mombo IM, Nkoghe D, Mboui Ondo S, et al. (2014) Zika Virus
- 514 in Gabon (Central Africa) – 2007: A New Threat from *Aedes albopictus*? *PLoS*
- 515 *Negl Trop Dis* 8: e2681. Available:
- 516 <http://dx.plos.org/10.1371/journal.pntd.0002681>.
- 517 28. Marchette NJ, Garcia R, Rudnick A (1969) Isolation of Zika virus from *Aedes*
- 518 *aegypti* mosquitoes in Malaysia. *Am J Trop Med Hyg* 18: 411–415. Available:
- 519 <http://www.ncbi.nlm.nih.gov/pubmed/4976739>.
- 520 29. Dick GW., Kitchen S., Haddow A. (1952) Zika Virus (I). Isolations and serological
- 521 specificity. *Trans R Soc Trop Med Hyg* 46: 509–520. Available:
- 522 [http://trstmh.oxfordjournals.org/cgi/doi/10.1016/0035-9203\(52\)90042-4](http://trstmh.oxfordjournals.org/cgi/doi/10.1016/0035-9203(52)90042-4).
- 523 30. Li MI, Wong PSJ, Ng LC, Tan CH (2012) Oral Susceptibility of Singapore *Aedes*
- 524 (*Stegomyia*) *aegypti* (Linnaeus) to Zika Virus. *PLoS Negl Trop Dis* 6: e1792.
- 525 Available: <http://dx.plos.org/10.1371/journal.pntd.0001792>.
- 526 31. Dong S, Kantor AM, Lin J, Passarelli AL, Clem RJ, et al. (2016) Infection pattern



- 527 and transmission potential of chikungunya virus in two New World laboratory-  
528 adapted *Aedes aegypti* strains. *Sci Rep* 6: 24729. Available:  
529 <http://www.nature.com/articles/srep24729>.
- 530 32. Li MI, Wong PSJ, Ng LC, Tan CH (2012) Oral Susceptibility of Singapore *Aedes*  
531 (*Stegomyia*) *aegypti* (Linnaeus) to Zika Virus. *PLoS Negl Trop Dis* 6: e1792.  
532 Available: <http://dx.plos.org/10.1371/journal.pntd.0001792>.
- 533 33. Frentiu FD, Zakir T, Walker T, Popovici J, Pyke AT, et al. (2014) Limited Dengue  
534 Virus Replication in Field-Collected *Aedes aegypti* Mosquitoes Infected with  
535 *Wolbachia*. *PLoS Negl Trop Dis* 8: e2688. Available:  
536 <http://dx.plos.org/10.1371/journal.pntd.0002688>.
- 537 34. Richardson J, Molina-Cruz A, Salazar MI, Black W (2006) Quantitative analysis of  
538 dengue-2 virus RNA during the extrinsic incubation period in individual *Aedes*  
539 *aegypti*. *Am J Trop Med Hyg* 74: 132–141. Available:  
540 <http://www.ncbi.nlm.nih.gov/pubmed/16407358>.
- 541 35. Faye O, Faye O, Diallo D, Diallo M, Weidmann M, et al. (2013) Quantitative real-  
542 time PCR detection of Zika virus and evaluation with field-caught Mosquitoes.  
543 *Virol J* 10: 311. Available: <http://www.virologyj.com/content/10/1/311>.  
544

**A****Bodies**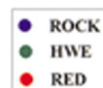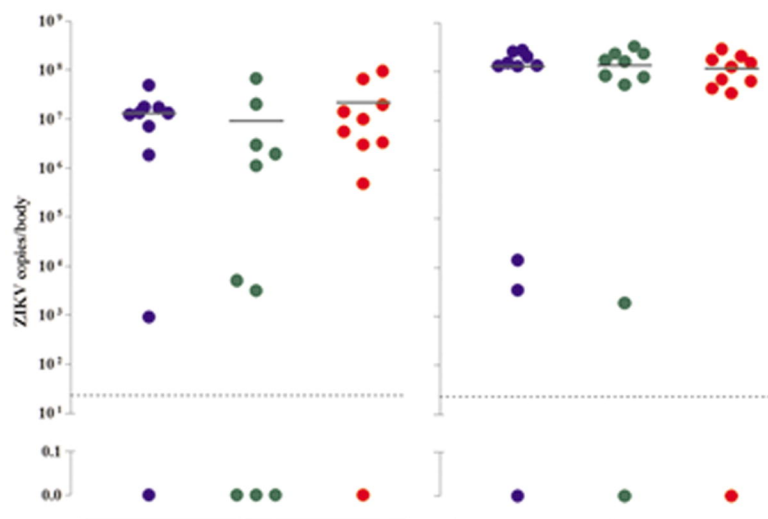

| Lab. strains                   | 7dpi               |                    |                    | 14dpi              |                    |                    |
|--------------------------------|--------------------|--------------------|--------------------|--------------------|--------------------|--------------------|
|                                | ROCK               | HWE                | RED                | ROCK               | HWE                | RED                |
| Total samples                  | 10                 | 10                 | 10                 | 10                 | 10                 | 10                 |
| Number Infected                | 9                  | 7                  | 9                  | 9                  | 9                  | 9                  |
| Infection rate (%)             | 90                 | 70                 | 90                 | 90                 | 90                 | 90                 |
| Mean ZIKV <sup>BR</sup> copies | $1.31 \times 10^7$ | $9.26 \times 10^6$ | $2.16 \times 10^7$ | $1.28 \times 10^8$ | $1.35 \times 10^8$ | $1.16 \times 10^8$ |
| Standard deviation             | $1.43 \times 10^7$ | $2.11 \times 10^7$ | $3.22 \times 10^7$ | $1.02 \times 10^8$ | $1.10 \times 10^8$ | $9.02 \times 10^7$ |
| Standard error                 | $4.51 \times 10^6$ | $6.67 \times 10^6$ | $1.02 \times 10^7$ | $3.21 \times 10^7$ | $3.48 \times 10^7$ | $2.85 \times 10^7$ |

**B****Heads**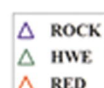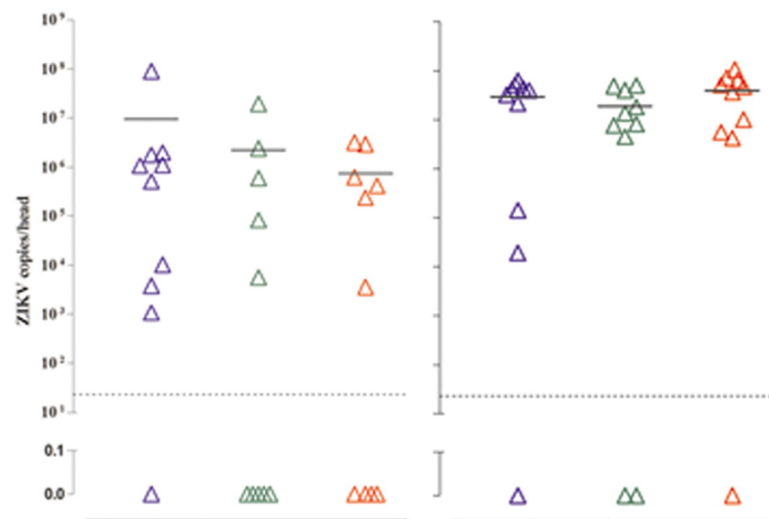

| Lab. strains                   | 7dpi               |                    |                    | 14dpi              |                    |                    |
|--------------------------------|--------------------|--------------------|--------------------|--------------------|--------------------|--------------------|
|                                | ROCK               | HWE                | RED                | ROCK               | HWE                | RED                |
| Total samples                  | 10                 | 10                 | 10                 | 10                 | 10                 | 10                 |
| Number Infected                | 9                  | 5                  | 6                  | 9                  | 8                  | 9                  |
| Infection rate (%)             | 90                 | 50                 | 60                 | 90                 | 80                 | 90                 |
| Mean ZIKV <sup>BR</sup> copies | $9.58 \times 10^6$ | $2.23 \times 10^6$ | $7.30 \times 10^5$ | $2.97 \times 10^7$ | $1.93 \times 10^7$ | $3.99 \times 10^7$ |
| Standard deviation             | $2.80 \times 10^7$ | $6.01 \times 10^6$ | $1.22 \times 10^6$ | $2.31 \times 10^7$ | $2.00 \times 10^7$ | $3.53 \times 10^7$ |
| Standard error                 | $8.86 \times 10^6$ | $1.90 \times 10^6$ | $3.87 \times 10^5$ | $7.32 \times 10^6$ | $6.32 \times 10^6$ | $1.12 \times 10^7$ |

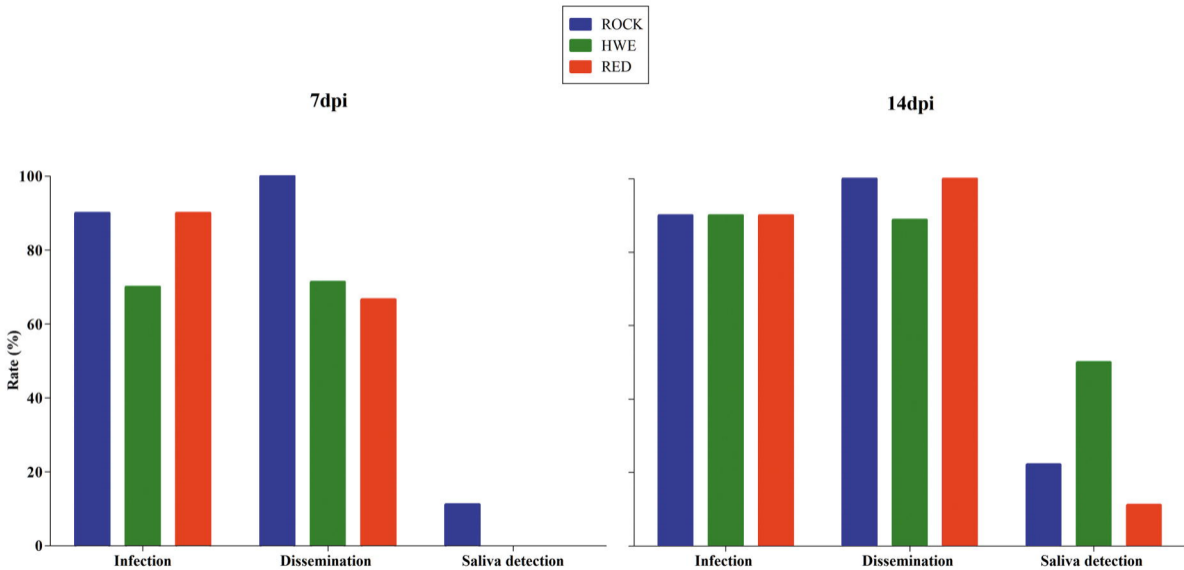

# Saliva

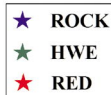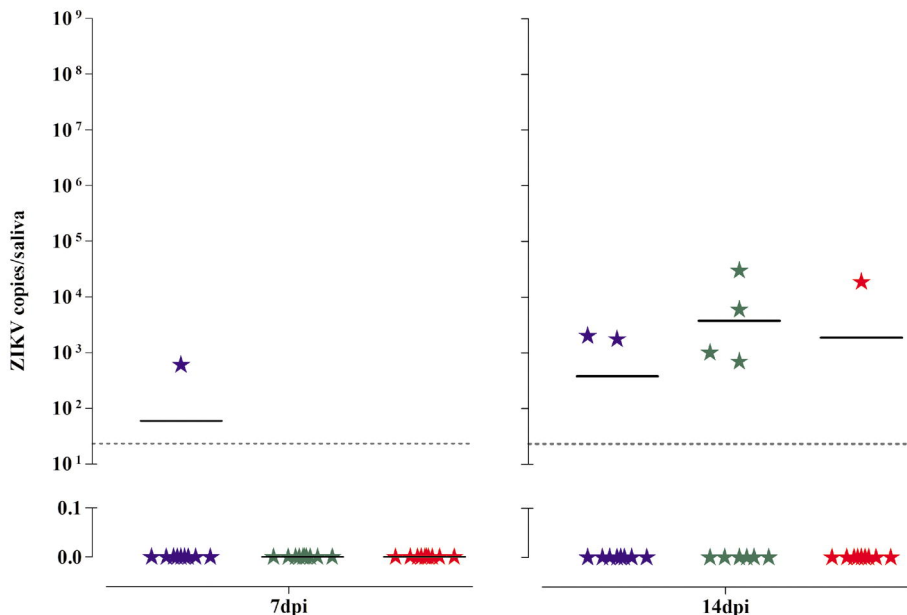

|                                | 7dpi               |      |      | 14dpi              |                    |                    |
|--------------------------------|--------------------|------|------|--------------------|--------------------|--------------------|
| Lab. strains                   | ROCK               | HWE  | RED  | ROCK               | HWE                | RED                |
| Total samples                  | 10                 | 10   | 10   | 10                 | 10                 | 10                 |
| Number Infected                | 1                  | 0    | 0    | 2                  | 4                  | 1                  |
| Infection rate (%)             | 10                 | 0    | 0    | 20                 | 40                 | 10                 |
| Mean ZIKV <sup>BR</sup> copies | $5.98 \times 10^1$ | 0.00 | 0.00 | $3.79 \times 10^2$ | $3.76 \times 10^3$ | $1.88 \times 10^3$ |
| Standard deviation             | $1.89 \times 10^2$ | 0.00 | 0.00 | $8.01 \times 10^2$ | $9.37 \times 10^3$ | $5.94 \times 10^3$ |
| Standard error                 | $5.98 \times 10^1$ | 0.00 | 0.00 | $2.53 \times 10^2$ | $2.96 \times 10^3$ | $1.88 \times 10^3$ |

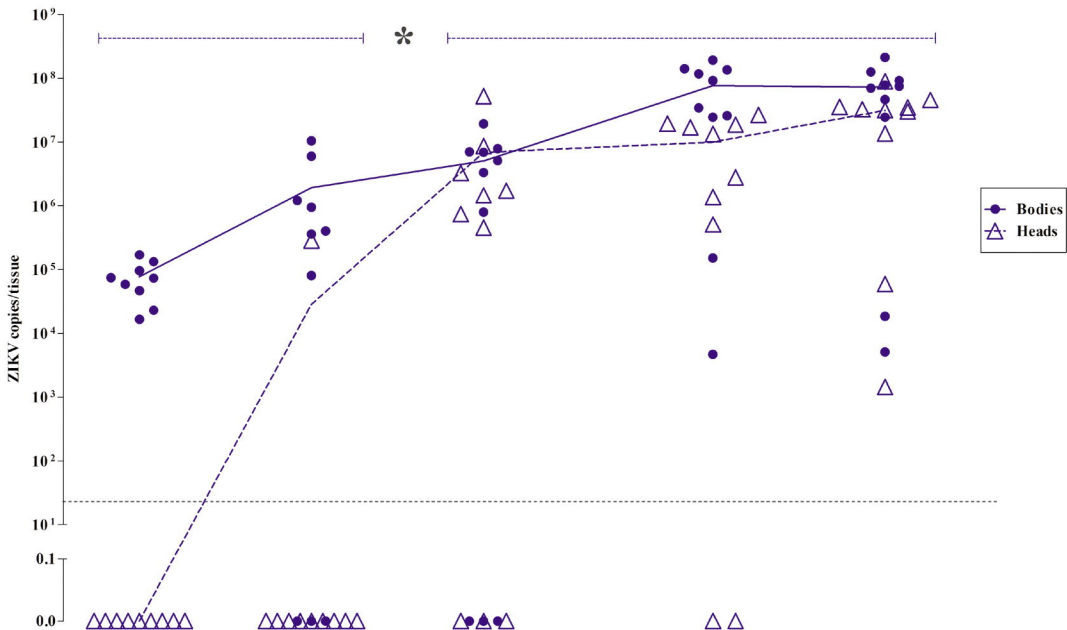

| ROCK                                 | 1 dpi              |       | 4 dpi              |                    | 7 dpi              |                    | 11 dpi             |                    | 14 dpi             |                    |
|--------------------------------------|--------------------|-------|--------------------|--------------------|--------------------|--------------------|--------------------|--------------------|--------------------|--------------------|
|                                      | Bodies             | Heads | Bodies             | Heads              | Bodies             | Heads              | Bodies             | Heads              | Bodies             | Heads              |
| <b>Total samples</b>                 | 9                  | 9     | 10                 | 10                 | 10                 | 10                 | 10                 | 10                 | 10                 | 10                 |
| <b>Number Infected</b>               | 9                  | 0     | 7                  | 1                  | 7                  | 7                  | 10                 | 8                  | 10                 | 10                 |
| <b>Infection rate (%)</b>            | 100                | 0     | 70                 | 10                 | 70                 | 70                 | 100                | 80                 | 100                | 100                |
| <b>Mean ZIKV<sup>BR</sup> copies</b> | $7.68 \times 10^4$ | 0.00  | $1.94 \times 10^6$ | $2.85 \times 10^4$ | $5.04 \times 10^6$ | $6.86 \times 10^6$ | $7.61 \times 10^7$ | $9.94 \times 10^6$ | $7.21 \times 10^7$ | $3.13 \times 10^7$ |
| <b>Standard deviation</b>            | $5.00 \times 10^4$ | 0.00  | $3.48 \times 10^6$ | $9.01 \times 10^4$ | $5.95 \times 10^6$ | $1.62 \times 10^7$ | $6.80 \times 10^7$ | $1.01 \times 10^7$ | $6.32 \times 10^7$ | $2.56 \times 10^7$ |
| <b>Standard error</b>                | $1.67 \times 10^4$ | 0.00  | $1.10 \times 10^6$ | $2.85 \times 10^4$ | $1.88 \times 10^6$ | $5.12 \times 10^6$ | $2.15 \times 10^7$ | $3.18 \times 10^6$ | $2.00 \times 10^7$ | $8.10 \times 10^6$ |
